# Supplementary material
Source: Springer Nature journal article supplement (https://www.springerprofessional.de/resource/supplementary/13638_2012_489_MOESM2_ESM.pdf/11897962)

*macro cell  
E-UTRAN interface*

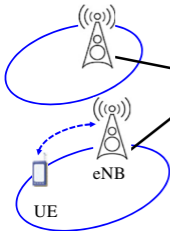

*core network*

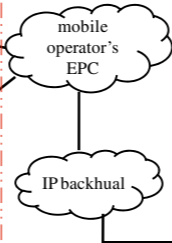

*femto cell  
E-UTRAN interface*

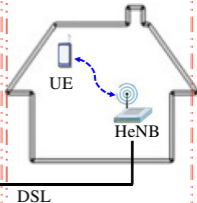

Supplement: MOESM2 [file 11897962]
